# Supplementary material for: Snowmelt-Driven Seasonal Infiltration and Flow in the Upper Critical Zone, Niwot Ridge (Colorado), USA
Source: MDPI journal article supplement (doi:10.3390/w14152317), 2022-07-26
Supplement: s1 [file s1]

Supplementary Materials Table S1. Niwot Ridge (CO.) USA soil moisture measurements\_2016

| Distance,<br>in m | COMO1<br>7.4.16<br>5TM | COMO1<br>7.16.16<br>5TM | COMO1<br>7.4.16<br>10HS | COMO1<br>7.16.16<br>10HS | COMO3<br>7.11.16<br>5TM | COMO3<br>7.16.16<br>5TM | COMO3<br>7.11.16<br>10HS | COMO3<br>7.16.16<br>10HS | COMO5<br>7.6.16<br>5TM | COMO5<br>7.16.16<br>5TM | COMO5<br>7.6.16<br>10HS | COMO5<br>7.16.16<br>10HS | COMO5<br>(wet)<br>7.6.16<br>5TM | COMO5<br>(wet)<br>7.16.16<br>5TM | COMO5<br>(wet)<br>7.6.16<br>10HS | COMO5<br>(wet)<br>7.16.16<br>10HS |
|-------------------|------------------------|-------------------------|-------------------------|--------------------------|-------------------------|-------------------------|--------------------------|--------------------------|------------------------|-------------------------|-------------------------|--------------------------|---------------------------------|----------------------------------|----------------------------------|-----------------------------------|
| 0                 | 17.4                   | 26.5                    | 37.5                    | 38                       | 26.9                    | 20.6                    | 39.7                     | 37.6                     | 19.6                   | 5.5                     | 31.3                    | 21.6                     |                                 |                                  |                                  |                                   |
| 1                 | 26.8                   | 11.8                    | 35.7                    | 32.6                     | 20.4                    | 23.3                    | 38                       | 37.4                     | 20.9                   | 4.2                     | 34.6                    | 16.6                     |                                 |                                  |                                  |                                   |
| 2                 | 26.6                   | 21.7                    | 33.1                    | 34.6                     | 14.2                    | 16.8                    | 33                       | 35.6                     | 17.2                   | 2.4                     | 31.1                    | 18.8                     |                                 |                                  |                                  |                                   |
| 3                 | 17.4                   | 20.9                    | 31.8                    | 24.8                     | 15.4                    | 8.7                     | 34.8                     | 33                       | 17.1                   | 1.6                     | 30.5                    | 14.6                     |                                 |                                  |                                  |                                   |
| 4                 | 27                     | 18.2                    | 35.6                    | 36.4                     | 17.5                    | 12.9                    | 36.7                     | 34.7                     | 31.3                   | 2.3                     | 35                      | 16.9                     |                                 |                                  |                                  |                                   |
| 5                 | 21.1                   | 18                      | 34.8                    | 30.9                     | 13.9                    | 12.5                    | 34.6                     | 30                       | 22.3                   | 3.8                     | 33.8                    | 18.8                     |                                 |                                  |                                  |                                   |
| 6                 | 22                     | 12.1                    | 32.2                    | 28.7                     | 21.1                    | 14.3                    | 35.3                     | 34.8                     | 17.6                   | 6.7                     | 29.3                    | 25.5                     |                                 |                                  |                                  |                                   |
| 7                 | 20.1                   | 12.5                    | 27.2                    | 31.2                     | 14.8                    | 12.7                    | 34.3                     | 31                       | 25.8                   | 6                       | 33.1                    | 25.7                     |                                 |                                  |                                  |                                   |
| 8                 | 24.5                   | 8.7                     | 35                      | 28.7                     | 16.3                    | 11.6                    | 32.6                     | 31.6                     | 24.7                   | 14.3                    | 34.4                    | 28                       |                                 |                                  |                                  |                                   |
| 9                 | 19.3                   | 4.5                     | 30.3                    | 23.9                     | 14.8                    | 4.5                     | 31                       | 25.1                     | 23.2                   | 18.6                    | 32.2                    | 35.1                     |                                 |                                  |                                  |                                   |
| 10                | 24                     | 8.4                     | 36.6                    | 24.8                     | 9.6                     | 6.6                     | 31.9                     | 27.5                     | 23.3                   | 17.9                    | 35.1                    | 28                       |                                 |                                  |                                  |                                   |
| 11                | 28.8                   | 12.8                    | 34.7                    | 31.3                     | 12.3                    | 0.8                     | 28.4                     | 11.5                     | 25.2                   | 12.7                    | 35                      | 31.6                     |                                 |                                  |                                  |                                   |
| 12                | 20.6                   | 15.3                    | 34.9                    | 34.8                     | 9.5                     | 3.9                     | 28.6                     | 27.4                     | 18.3                   | 16.8                    | 32                      | 32.2                     |                                 |                                  |                                  |                                   |
| 13                | 22.6                   | 16.8                    | 36.5                    | 33.8                     | 9.1                     | 4                       | 26.3                     | 25.9                     | 14.5                   | 15.1                    | 34.4                    | 32.9                     |                                 |                                  |                                  |                                   |
| 14                | 28.1                   | 16                      | 41.3                    | 32.9                     | 8                       | 7.5                     | 32.9                     | 24.3                     | 18.1                   | 9.8                     | 37.3                    | 33.1                     |                                 |                                  |                                  |                                   |
| 15                | 17.6                   | 20.4                    | 40.1                    | 36.1                     | 14.7                    | 11.8                    | 34                       | 30.4                     | 23.6                   | 12.2                    | 36.1                    | 29.6                     |                                 |                                  |                                  |                                   |
| 16                | 20.2                   | 17.6                    | 34.6                    | 33.1                     | 14.7                    | 11.8                    | 32.6                     | 29.3                     | 20.4                   | 1.3                     | 30.3                    | 24                       |                                 |                                  |                                  |                                   |
| 17                | 30.1                   | 15.8                    | 40.8                    | 37.1                     | 15.4                    | 3.1                     | 32.2                     | 19.3                     | 15.2                   | 11                      | 31                      | 31.6                     |                                 |                                  |                                  |                                   |
| 18                | 31.3                   | 16.1                    | 39.2                    | 30.6                     | 17                      | 9.4                     | 29.9                     | 26.8                     | 24.3                   | 20.1                    | 36.8                    | 36.3                     |                                 |                                  |                                  |                                   |
| 19                | 38.2                   | 25.8                    | 40.2                    | 39.4                     | 16.8                    | 6.4                     | 28.3                     | 27.8                     | 25.5                   | 10.7                    | 38.9                    | 33.1                     |                                 |                                  |                                  |                                   |
| 20                | 32.8                   | 17.9                    | 33.8                    | 31.6                     | 15.4                    | 5.5                     | 31.2                     | 20                       | 19.3                   | 1.1                     | 34.8                    | 14.3                     |                                 |                                  |                                  |                                   |
| 21                | 30.6                   | 13.6                    | 33.7                    | 35.4                     | 4.5                     | 2.4                     | 23.6                     | 25.1                     | 15.6                   | 8.1                     | 33.8                    | 29.8                     |                                 |                                  |                                  |                                   |
| 22                | 25                     | 14.7                    | 29.4                    | 29.5                     | 9.1                     | 10.7                    | 31.6                     | 29.7                     | 15.2                   | 12.7                    | 37.7                    | 33.6                     |                                 |                                  |                                  |                                   |
| 23                | 22                     | 14.2                    | 31.2                    | 30.6                     | 6.3                     | 10.2                    | 29.8                     | 27.5                     | 31.5                   | 18.6                    | 37.4                    | 35.6                     |                                 |                                  |                                  |                                   |
| 24                | 18.4                   | 19.1                    | 35.2                    | 31.7                     | 14.6                    | 12.9                    | 30.2                     | 29.5                     | 21.7                   | 17.1                    | 38.7                    | 32.9                     |                                 |                                  |                                  |                                   |
| 25                | 23                     | 15.5                    | 31.5                    | 32.3                     | 12.1                    | 6.1                     | 32.1                     | 25                       |                        |                         |                         |                          | 32.4                            | 17.2                             | 41.8                             | 34.4                              |
| 26                | 18.1                   | 16.1                    | 30.8                    | 32.4                     | 19.4                    | 9.8                     | 33.6                     | 26.1                     |                        |                         |                         |                          | 36.4                            | 15.1                             | 41.8                             | 31.2                              |
| 27                | 24.8                   | 18.9                    | 32.3                    | 33.5                     | 10                      | 11.1                    | 28.4                     | 28.7                     |                        |                         |                         |                          | 29.9                            | 21.5                             | 40.4                             | 35.7                              |
| 28                | 22                     | 18                      | 34.7                    | 32.6                     | 18                      | 13.4                    | 33.6                     | 30.1                     |                        |                         |                         |                          | 49.1                            | 22.7                             | 47.8                             | 40.1                              |
| 29                | 21.2                   | 15.1                    | 35.8                    | 33.7                     | 16.6                    | 12.5                    | 31.3                     | 30.3                     |                        |                         |                         |                          | 36.7                            | 14.3                             | 45                               | 35.8                              |
| 30                | 15                     | 18.1                    | 31                      | 35.3                     | 15.4                    | 11.4                    | 31.7                     | 26.6                     |                        |                         |                         |                          | 44.6                            | 23.8                             | 46.8                             | 37.9                              |

Note: All values are volumetric moisture content, in weight percent
